# Supplementary material
Source: ML conference proceedings conference paper supplement (https://openreview.net/forum?id=tQgFLIkvKH)
Supplement: supplementary_material [file Estimation_of_Stochastic_OT_Maps_Supplement.pdf › supplement/Estimation_of_Stochastic_OT_Maps_Supplement.pdf]

784 **Note:** For Theorem 4, our lower bound construction does not fully match the claim in the current  
 785 statement. See Appendix E.2 for the correction (which is still strong enough to support the discussion  
 786 on reductions which follows the theorem). We will update this in the revised version.

## 787 A Proofs for Section 2

### 788 A.1 Proof of Proposition 1

789 Clearly,  $\mathcal{E}_p(\kappa; \mu, \nu) = 0$  if  $\kappa$  minimizes (2). On the other hand, if  $\mathcal{E}_p(\kappa, \mu, \nu) = 0$ , then  $\kappa_{\#}\mu = \nu$ .  
 790 Thus,  $\kappa$  is feasible for (2) with optimal objective value, i.e., it is a minimizer.

791 Further, if  $T^*$  is an optimal map, then  $W_p(\mu, \nu) = \|T^* - \text{Id}\|_{L^p(\mu)}$  and  $T_{\#}^*\mu = \nu$ . We thus bound

$$\begin{aligned}\mathcal{E}_p(T; \mu, \nu) &= [\|T - \text{Id}\|_{L^p(\mu)} - W_p(\mu, \nu)]_+ + W_p(T_{\#}\mu, \nu) \\ &= [\|T - \text{Id}\|_{L^p(\mu)} - \|T^* - \text{Id}\|_{L^p(\mu)}]_+ + W_p(T_{\#}\mu, T_{\#}^*\mu) \\ &\leq 2\|T - T^*\|_{L^p(\mu)},\end{aligned}$$

792 as desired.  $\square$

### 793 A.2 Reverse $L^2$ comparison (Remark 2)

794 Suppose that there exists a unique Brenier map of the form  $T^* = \nabla\varphi$ , where  $\varphi : \mathbb{R}^d \rightarrow \mathbb{R}^d$  is convex  
 795 and twice differentiable such that  $H\varphi \preceq LI_d$  for  $L \geq 1$ . Fixing any map  $T : \mathcal{X} \rightarrow \mathcal{Y}$ , we abbreviate  
 796  $\varepsilon = \mathcal{E}_2(T; \mu, \nu)$ . By the definition of  $\mathcal{E}_2$ , we have  $W_2(T_{\#}\mu, \nu) \leq \varepsilon$ . Let  $\lambda \in \mathcal{K}(\mathcal{Y}, \mathcal{Y})$  be a kernel  
 797 which achieves this bound, and take  $\kappa = \lambda \circ T$ . By construction, we have  $\kappa_{\#}\mu = \nu$  and

$$\begin{aligned}\left(\iint \|y - x\|^2 d\kappa(y|x) d\mu(x)\right)^{\frac{1}{2}} - W_2(\mu, \nu) &\leq \left(\iint \|T(x) - x\|^2 d\mu(x)\right)^{\frac{1}{2}} + W_2(\mu, \nu) + \varepsilon \\ &\leq 2\varepsilon.\end{aligned}$$

798 Consequently, we have

$$\begin{aligned}\iint \|y - x\|^2 d\kappa(y|x) d\mu(x) - W_2(\mu, \nu)^2 &\leq 2\varepsilon \left( \left(\iint \|y - x\|^2 d\kappa(y|x) d\mu(x)\right)^{\frac{1}{2}} + W_2(\mu, \nu) \right) \\ &\leq 2\varepsilon \cdot (2W_2(\mu, \nu) + 2\varepsilon)\end{aligned}$$

799 Thus, by Proposition 3.1 of Li and Nochetto [2021], we have

$$\begin{aligned}\iint \|y - T^*(x)\|^2 d\kappa(y|x) d\mu(x) &\leq L \left( \iint \|y - x\|^2 d\kappa(y|x) d\mu(x) - W_2(\mu, \nu)^2 \right) \\ &\leq 4L\varepsilon \cdot (W_2(\mu, \nu) + \varepsilon).\end{aligned}$$

800 Finally, we bound

$$\begin{aligned}\|T - T^*\|_{L^2(\mu)} &\leq \left(\iint \|y - T^*(x)\|^2 d\kappa(y|x) d\mu(x)\right)^{\frac{1}{2}} + \varepsilon \\ &\leq \sqrt{4L\varepsilon \cdot (W_2(\mu, \nu) + \varepsilon)} + \varepsilon \\ &\lesssim \sqrt{L\varepsilon \cdot (W_2(\mu, \nu) + \varepsilon)},\end{aligned}$$

801 as desired.

## 802 B Proofs for Section 2

### 803 B.1 Proof of Lemma 2

804 We simply bound

$$\begin{aligned}|\mathcal{E}_p(\kappa; \mu, \nu) - \mathcal{E}_p(\kappa; \mu, \nu')| &\leq |W_p(\mu, \nu) - W_p(\mu, \nu')| + |W_p(\kappa_{\#}\mu, \nu) - W_p(\kappa_{\#}\mu, \nu')| \\ &\leq 2W_p(\nu, \nu') \\ &\leq 2\text{diam}(\mathcal{Y})\|\nu - \nu'\|_{\text{TV}},\end{aligned}$$

805 where the final inequality uses Fact 1.  $\square$

## 806 B.2 Proof of Lemma 3

807 While the key ideas of this proof are straightforward, measurability issues require some care (we  
 808 encourage the reader to skip such details on an initial read). In what follows, we equip all spaces  
 809 of distributions with the weak topology and always employ Borel measurability. By the definition  
 810 of a Markov kernel,  $x \in \mathcal{X} \mapsto \kappa_x(A)$  is a measurable function for each measurable  $A \subseteq \mathcal{Y}$ . Thus,  
 811  $(x, x') \in \mathcal{X}^2 \mapsto (\kappa_x(A), \kappa_{x'}(B))$  is measurable for fixed, measurable  $A, B \subseteq \mathcal{Y}$ , implying that  
 812  $(x, x') \in \mathcal{X}^2 \mapsto (\kappa_x, \kappa_{x'}) \in \mathcal{P}(\mathcal{Y})^2$  is measurable. Therefore, by Theorem 3.0.8 of [Toneian \[2019\]](#),  
 813 there exists a measurable map  $(x, x') \in \mathcal{X}^2 \mapsto \gamma_{x, x'} \in \Pi(\kappa_x, \kappa_{x'})$  such that  $\gamma_{x, x'}$  is an OT plan for  
 814  $W_p(\kappa_x, \kappa_{x'})$  for all  $x, x' \in \mathcal{X}$ .

815 Now, let  $\pi_0 \in \Pi(\mu, \mu')$  be an OT plan for  $W_p(\mu, \mu')$ , and define the joint law  $\pi$  by  $\pi(A \times B \times C \times$   
 816  $D) := \iint_{A \times B} \gamma_{x, x'}(C \times D) d\pi_0(x, x')$ , which is well-defined due to the measurability argument  
 817 above. Taking  $(X, X', Y, Y') \sim \pi$ , our construction ensures the following:

- 818 •  $X \sim \mu$  and  $X' \sim \mu'$  such that  $\mathbb{E}[\|X - X'\|^p] = \rho^p$ ,
- 819 •  $Y \sim \kappa_X$  and  $Y' \sim \kappa_{X'}$  such that  $\mathbb{E}[\|Y - Y'\|^p | X, X'] = W_p(\kappa_X, \kappa_{X'})^p$ .

820 Consequently, we bound

$$\begin{aligned}
 \mathbb{E}[\|Y - Y'\|^p] &= \mathbb{E}[\mathbb{E}[\|Y - Y'\|^p | X, X']] \\
 &= \mathbb{E}[W_p(\kappa_X, \kappa_{X'})^p] \\
 &\leq \mathbb{E}[L^p \|X - X'\|^{\alpha p}] && \text{(Hölder continuity of } \kappa) \\
 &\leq L^p \mathbb{E}[\|X - X'\|^{\alpha p}] && \text{(Jensen's inequality, } 0 < \alpha \leq 1) \\
 &= L^p \rho^{\alpha p}.
 \end{aligned}$$

821 Moreover, using Minkowski's inequality, we compute

$$|\mathbb{E}[\|Y - X\|^p]^{\frac{1}{p}} - \mathbb{E}[\|Y' - X'\|^p]^{\frac{1}{p}}| \leq \mathbb{E}[\|X - X'\|^p]^{\frac{1}{p}} + \mathbb{E}[\|Y - Y'\|^p]^{\frac{1}{p}} \leq \rho + L\rho^\alpha.$$

822 Finally, we bound  $|W_p(\mu, \nu) - W_p(\mu', \nu)| \leq W_p(\mu, \mu') \leq \rho$  and

$$|W_p(\kappa_\# \mu, \nu) - W_p(\kappa_\# \mu', \nu)| \leq W_p(\kappa_\# \mu, \kappa_\# \mu') \leq \mathbb{E}[\|Y - Y'\|^p]^{\frac{1}{p}} \leq L\rho^\alpha.$$

823 The definition of  $\mathcal{E}_p$  and these bounds give the lemma. □

## 824 B.3 Proof of Lemma 4

825 To show this result, we prove a slightly more general lemma.

826 **Lemma 6.** Fix  $\mu, \mu' \in \mathcal{P}(\mathcal{X})$ ,  $\nu \in \mathcal{P}(\mathcal{Y})$ , and kernel  $\kappa \in \mathcal{K}(\mathcal{X}, \mathcal{Y})$  satisfying  $\iint \|y -$   
 827  $x\|^p d\kappa_x(y) d\mu(x) \leq W_p(\mu, \kappa_\# \mu)^p + \tau^p$  and  $W_p(\kappa_\# \mu, \nu) \leq \tau$  for some  $\tau \geq 0$ . Then, setting  
 828  $\varepsilon = \|\mu - \mu'\|_{\text{TV}}$ , we have  $\mathcal{E}_p(\kappa; \mu', \nu) \leq 4 \text{diam}(\mathcal{Y}) \varepsilon^{1/p} + 2\tau$ .

829 *Proof.* In what follows, we encourage the reader to focus on the  $p = 1$  case, where computations  
 830 are more direct. Write  $\varepsilon = \|\mu - \mu'\|_{\text{TV}}$ . By the TV bound, there exist  $\alpha, \beta, \gamma \in \mathcal{M}_+(\mathcal{X})$  with  
 831  $\gamma(\mathcal{X}) = 1 - \varepsilon$  and  $\alpha(\mathcal{X}) = \beta(\mathcal{X}) = \varepsilon$  such that  $\mu = \gamma + \alpha$  and  $\mu' = \gamma + \beta$ .

832 First, we note that  $\kappa$  must perform well on  $\gamma$ . Specifically, we have

$$\begin{aligned}
 &\iint \|x - y\|^p d\kappa_x(y) d\gamma(x) \\
 &= \iint \|x - y\|^p d\kappa_x(y) d\mu(x) - \iint \|x - y\|^p d\kappa_x(y) d\alpha(x) && (\gamma = \mu - \alpha) \\
 &\leq W_p(\mu, \kappa_\# \mu)^p + \tau^p - W_p(\alpha, \kappa_\# \alpha)^p && \text{(error bound for } \kappa, \text{ def. of } W_p) \\
 &\leq W_p(\gamma, \kappa_\# \gamma)^p + W_p(\alpha, \kappa_\# \alpha)^p + \tau^p - W_p(\alpha, \kappa_\# \alpha)^p && (\mu = \gamma + \alpha) \\
 &= W_p(\gamma, \kappa_\# \gamma)^p + \tau^p \\
 &\leq (W_p(\gamma, \kappa_\# \gamma) + \tau)^p && (\ell_p \leq \ell_1)
 \end{aligned}$$

833 Now, letting  $\kappa'$  be an optimal kernel for the  $W_p(\mu', \nu)$  problem and writing  $D = \text{diam}(\mathcal{Y})$ , we have

$$\begin{aligned}
& \left( \iint \|y - x\|^p d\kappa_x(y) d\mu'(x) \right)^{\frac{1}{p}} - W_p(\mu', \nu) \\
&= \left( \iint \|y - x\|^p d\kappa_x(y) d\mu'(x) \right)^{\frac{1}{p}} - \left( \iint \|y - x\|^p d\kappa'_x(y) d\mu'(x) \right)^{\frac{1}{p}} \quad (\text{optimality of } \kappa') \\
&= \left( \iint \|y - x\|^p d\kappa_x(y) d\gamma(x) + \iint \|y - x\|^p d\kappa_x(y) d\beta(x) \right)^{\frac{1}{p}} \quad (\mu' = \gamma + \beta) \\
&\quad - \left( \iint \|y - x\|^p d\kappa'_x(y) d\gamma(x) + \iint \|y - x\|^p d\kappa'_x(y) d\beta(x) \right)^{\frac{1}{p}} \\
&\leq \left( \left[ \left( \iint \|y - x\|^p d\kappa_x(y) d\gamma(x) \right)^{\frac{1}{p}} - \left( \iint \|y - x\|^p d\kappa'_x(y) d\gamma(x) \right)^{\frac{1}{p}} \right]_+^p \right. \\
&\quad \left. + \left[ \left( \iint \|y - x\|^p d\kappa_x(y) d\beta(x) \right)^{\frac{1}{p}} - \left( \iint \|y - x\|^p d\kappa'_x(y) d\beta(x) \right)^{\frac{1}{p}} \right]_+^p \right)^{\frac{1}{p}} \\
&\leq \left( [W_p(\gamma, \kappa_\# \gamma) + \tau - W_p(\gamma, \kappa'_\# \gamma)]_+^p \right. \\
&\quad \left. + \left[ \left( \iint \|y - x\|^p d\kappa_x(y) d\beta(x) \right)^{\frac{1}{p}} - \left( \iint \|y - x\|^p d\kappa'_x(y) d\beta(x) \right)^{\frac{1}{p}} \right]_+^p \right)^{\frac{1}{p}} \\
&\leq \left( (W_p(\kappa_\# \gamma, \kappa'_\# \gamma) + \tau)^p + \iint \|y - y'\|^p d\kappa_x(y) d\kappa'_x(y') d\beta(x) \right)^{\frac{1}{p}} \\
&\leq ((W_p(\kappa_\# \gamma, \kappa'_\# \gamma) + \tau)^p + \varepsilon D^p)^{\frac{1}{p}} \quad (\text{Fact } \textcolor{red}{I}) \\
&\leq W_p(\kappa_\# \gamma, \kappa'_\# \gamma) + \tau + D\varepsilon^{1/p}. \quad (\ell_p \leq \ell_1)
\end{aligned}$$

834 The first inequality uses that  $(A^p + B^p)^{1/p} - (a^p + b^p)^{1/p} \leq ([A - a]_+^p + [B - b]_+^p)^{1/p}$ , which can  
835 be obtained by rearranging the  $\ell_p$  triangle inequality and using that  $A = [A - a]_+ + A \wedge a$ . The  
836 second inequality uses the previous bound and the fact that  $\kappa'$  is feasible for the  $W_p(\gamma, \kappa'_\# \gamma)$  problem.  
837 The third uses the  $W_p$  triangle inequality and Minkowski's inequality.

838 We next bound  $W_p(\kappa_\# \gamma, \kappa'_\# \gamma)$ . Let  $\pi \in \Pi(\kappa_\# \mu, \nu)$  be an optimal plan for  $W_p(\kappa_\# \mu, \nu)$  and define  
839  $\lambda \in (1 - \varepsilon)\mathcal{P}(\mathcal{Y})$  by  $\lambda(\cdot) = \int \pi(\cdot | x) d\gamma(x)$ . By construction,  $W_p(\kappa_\# \gamma, \lambda) \leq W_p(\kappa_\# \mu, \nu) \leq \tau$ .  
840 Moreover, both  $\lambda$  and  $\kappa'_\# \gamma$  are submeasures of  $\nu$  with mass  $1 - \varepsilon$ , and so they must share common  
841 mass at least  $1 - 2\varepsilon$ . This implies that their TV distance is at most  $\varepsilon$ , and so Fact [I](#) gives that

$$W_p(\kappa_\# \gamma, \kappa'_\# \gamma) \leq \tau + W_p(\lambda, \kappa'_\# \gamma) \leq \tau + D\varepsilon^{\frac{1}{p}}. \quad (7)$$

842 Thus, the previous bound on the optimality gap can be tightened to

$$\left( \iint \|y - x\|^p d\kappa_x(y) d\mu'(x) \right)^{\frac{1}{p}} - W_p(\mu', \nu) \leq \tau + 2D\varepsilon^{1/p}.$$

843 Similarly, we bound the feasibility gap by

$$\begin{aligned}
W_p(\kappa_\# \mu', \nu) &= W_p(\kappa_\# \gamma + \kappa_\# \beta, \kappa'_\# \gamma + \kappa'_\# \beta) & (\mu' = \gamma + \beta, \kappa'_\# \gamma = \nu) \\
&\leq W_p(\kappa_\# \gamma, \kappa'_\# \gamma) + W_p(\kappa_\# \beta, \kappa'_\# \beta) & (\text{joint convexity of } W_p) \\
&\leq \tau + 2D\varepsilon^{\frac{1}{p}}. & (\text{Fact } \textcolor{red}{I} \text{ and Eq. } \textcolor{red}{7})
\end{aligned}$$

844 Combining, we have that  $\mathcal{E}_p(\kappa; \mu', \nu) \leq 2\tau + 4D\varepsilon^{1/p}$ , as desired.  $\square$

845 We now seek to find a suitable error bound  $\tau$  in terms of  $\mathcal{E}_p(\kappa; \mu, \nu)$ . First, we have by definition that  
 846  $W_p(\kappa_{\#}\mu, \nu) \leq \mathcal{E}_p(\kappa; \mu, \nu)$ . Further,  $\mathcal{E}_p(\kappa; \mu, \nu) \leq 2 \text{diam}(\mathcal{X} \cup \mathcal{Y})$ . Thus, we can also bound

$$\begin{aligned} \iint \|y - x\|^p d\kappa_x(y) d\mu(x) &\leq (W_p(\mu, \nu) + \mathcal{E}_p(\kappa; \mu, \nu))^p \\ &\leq (W_p(\mu, \kappa_{\#}\mu) + 2\mathcal{E}_p(\kappa; \mu, \nu))^p \\ &\leq W_p(\mu, \kappa_{\#}\mu)^p + 2p\mathcal{E}_p(\kappa; \mu, \nu)(W_p(\mu, \kappa_{\#}\mu) \vee 2\mathcal{E}_p(\kappa; \mu, \nu))^{p-1} \\ &\leq W_p(\mu, \kappa_{\#}\mu)^p + 2p\mathcal{E}_p(\kappa; \mu, \nu)(W_p(\mu, \nu) + 3\mathcal{E}_p(\kappa; \mu, \nu))^{p-1} \\ &\leq W_p(\mu, \kappa_{\#}\mu)^p + 2p\mathcal{E}_p(\kappa; \mu, \nu)W_p(\mu, \nu)^{p-1} + 3^p p\mathcal{E}_p(\kappa; \mu, \nu)^p. \end{aligned}$$

847 Thus, we can take

$$\begin{aligned} \tau &= \mathcal{E}_p(\kappa; \mu, \nu) \vee [2p\mathcal{E}_p(\kappa; \mu, \nu)W_p(\mu, \nu)^{p-1} + 3^p p\mathcal{E}_p(\kappa; \mu, \nu)^p]^{\frac{1}{p}} \\ &\leq 3\mathcal{E}_p(\kappa; \mu, \nu)^{\frac{1}{p}} W_p(\mu, \nu)^{\frac{p-1}{p}} + 5\mathcal{E}_p(\kappa; \mu, \nu) \end{aligned}$$

848 Plugging into Lemma 6 gives that

$$\mathcal{E}_p(\kappa; \mu', \nu) \leq 4D\varepsilon^{1/p} + 6\mathcal{E}_p(\kappa; \mu, \nu)^{\frac{1}{p}} W_p(\mu, \nu)^{\frac{p-1}{p}} + 10\mathcal{E}_p(\kappa; \mu, \nu),$$

849 as desired. The  $p = 1$  result is immediate.  $\square$

## 850 B.4 Proof of Lemma 5

851 First, we note that  $\kappa_{\#}(\lambda_{\#}\mu) = (\kappa \circ \lambda)_{\#}\mu$  by the definition of kernel composition. This implies that the  
 852 two feasibility gaps coincide. Moreover, by Minkowski's inequality, we have

$$\begin{aligned} &\left| \left( \iint \|y - z\|^p d\kappa_z(y) d(\lambda_{\#}\mu)(z) \right)^{\frac{1}{p}} - \left( \iint \|y - x\|^p d(\kappa \circ \lambda)_x(y) d\mu(x) \right)^{\frac{1}{p}} \right| \\ &\leq \left( \iint \|z - x\|^p d\lambda_x(z) d\mu(x) \right)^{\frac{1}{p}} \end{aligned}$$

853 and

$$|W_p(\lambda_{\#}\mu, \nu) - W_p(\mu, \nu)| \leq W_p(\mu, \lambda_{\#}\mu) \leq \left( \iint \|z - x\|^p d\lambda_x(z) d\mu(x) \right)^{\frac{1}{p}}.$$

854 Combining these two error bounds gives the lemma.  $\square$

## 855 C Proofs for Section 3

### 856 C.1 Proof of Theorem 1

857 By the support constraint, our cost  $\|x - y\|^p$  is  $pd^{(p-1)/2}$ -Lipschitz over  $\mathcal{X} \times \mathcal{Y}$ . Thus, by Theorem  
 858 1 of Genevay et al. [2019], we have

$$S_{p,\tau}(\hat{\mu}_n, \hat{\nu}_n) \leq W_p(\hat{\mu}_n, \hat{\nu}_n)^p + 2\tau d \log(e^2 p d^{p/2-1} \tau^{-1}).$$

859 Since  $\hat{\pi}_{\tau,n}$  achieves the left hand side above and KL divergence is non-negative, we have

$$\iint \|x - y\|^p d\hat{\kappa}_n(y|x) d\hat{\mu}_n(x) \leq W_p(\hat{\mu}_n, \hat{\nu}_n)^p + 2\tau d \log(e^2 p d^{p/2-1} \tau^{-1}).$$

860 Taking  $p$ th roots and noting that  $(\hat{\kappa}_n)_{\#}\hat{\mu}_n = \hat{\nu}_n$ , this implies that

$$\mathcal{E}_p(\hat{\kappa}_n; \hat{\mu}_n, \hat{\nu}_n) \leq \left[ 2\tau d \log(e^2 p d^{p/2-1} \tau^{-1}) \right]^{\frac{1}{p}} \leq 4(\tau d)^{\frac{1}{p}} \log(e^2 d \tau^{-1}).$$

861 Now, by (6),  $(\hat{\kappa}_n)_x$  is obtained by applying softmax to  $v(x) := ((g_{\tau}(Y_i) - \|x - Y_i\|^p)/\tau)_{i=1}^n \in \mathbb{R}^n$ .  
 862 Since the  $\ell_1, \ell_{\infty}$  Lipschitz constant of the softmax operation is  $\leq 1$ , we have

$$\|(\hat{\kappa}_n)_x - (\hat{\kappa}_n)_{x'}\|_{\text{TV}} \leq \frac{1}{2} \|v(x) - v(x')\|_{\infty} \leq \frac{1}{2} p d^{(p-1)/2} \tau^{-1} \|x - x'\|_2$$

for all  $x, x' \in [0, 1]^d$ . Thus, by Fact 1,  $\hat{\kappa}_n$  is Hölder continuous under  $W_p$  with exponent  $1/p$  and constant  $2\sqrt{d}\tau^{-1/p}$ . Applying Lemma 3 now gives

$$\begin{aligned}\mathcal{E}_p(\hat{\kappa}_n; \mu, \nu) &\leq \mathcal{E}_p(\hat{\kappa}_n; \mu, \hat{\nu}_n) + W_p(\hat{\nu}_n, \nu) \\ &\leq \mathcal{E}_p(\hat{\kappa}_n; \hat{\mu}_n, \hat{\nu}_n) + 2W_p(\mu, \hat{\mu}_n) + 4\sqrt{d}W_p(\mu, \hat{\mu})^{\frac{1}{p}}\tau^{-\frac{1}{p}} + W_p(\nu, \hat{\nu}_n) \\ &\leq 4(\tau d)^{\frac{1}{p}} \log(e^2 d \tau^{-1}) + 4\sqrt{d}W_p(\mu, \hat{\mu})^{\frac{1}{p}}\tau^{-\frac{1}{p}} + 2W_p(\mu, \hat{\mu}_n) + W_p(\nu, \hat{\nu}_n).\end{aligned}$$

Taking expectations, applying Lemma 1, and plugging in  $\tau$  gives the theorem.  $\square$

## C.2 Minimax Lower Bound under Sampling

Fix  $\mu = \delta_0$ , so that the constant kernel  $\kappa^*$  defined by  $\kappa_x^* \equiv \nu$  is optimal. Note that the error  $\mathcal{E}_p(\kappa; \mu, \nu)$  of any kernel  $\kappa$  is thus lower bounded by the feasibility gap  $W_p(\kappa_0, \nu)$ . Since we only observe  $n$  i.i.d. samples from  $\nu \in \mathcal{P}([0, 1]^d)$ , any upper bound on an estimator for this problem instance also gives an upper bound for  $n$ -sample distribution estimation of  $\nu$  under  $W_p$ . However, the minimax lower bound of Singh and Póczos [2018] implies that no distribution estimator can achieve  $W_p$  error less than  $n^{-1/(2p \vee d)}$  for all  $\nu \in \mathcal{P}([0, 1]^d)$ .

## C.3 Proof of Theorem 2

We start with some helpful lemmas.

**Lemma 7** (Rigollet [2015], Theorem 1.14). *Let  $\mu \in \mathcal{P}(\mathbb{R})$  be 1-sub-Gaussian. Then, for  $X_1, \dots, X_n$  sampled i.i.d. from  $\mu$ , we have  $\max_{i=1, \dots, n} X_i \leq \sqrt{2 \log(n/\delta)}$  with probability at least  $1 - \delta$ .*

**Lemma 8.** *Let  $\mu \in \mathcal{P}(\mathbb{R}^d)$  be 1-sub-Gaussian and let  $\mathcal{P}$  denote the regular partition of  $\mathbb{R}^d$  into cubes of side-length  $r > 0$ . Then, for any choice of rounding map  $r_{\mathcal{P}}$ , we have*

$$\mathbb{E}[\|(r_{\mathcal{P}})_{\#}(\hat{\mu}_n - \mu)\|_{\text{TV}}] = \tilde{O}\left(\sqrt{\frac{5^d r^{-d}}{n}}\right).$$

*Proof.* Let  $B$  denote a ball of radius  $R = \sqrt{2 \log(n)}$  centered at the origin, so that  $\mu(B) \geq 1 - 1/n$  by Lemma 7. Write  $\mathcal{P}_R$  for the subset of partition blocks  $P \in \mathcal{P}$  which intersect  $B$ , and note that  $|\mathcal{P}_R| \leq \text{vol}(B)r^{-d} \leq (3R/r)^d$ . We then bound

$$\begin{aligned}\mathbb{E}[\|(r_{\mathcal{P}})_{\#}(\hat{\mu}_n - \mu)\|_{\text{TV}}] &= \frac{1}{2} \mathbb{E}\left[\sum_{P \in \mathcal{P}} |(\hat{\mu}_n - \mu)(P)|\right] \\ &= \frac{1}{2} \mathbb{E}\left[\sum_{P \in \mathcal{P}_R} |(\hat{\mu}_n - \mu)(P)| + \sum_{P \in \mathcal{P} \setminus \mathcal{P}_R} |(\hat{\mu}_n - \mu)(P)|\right] \\ &\lesssim \sqrt{\frac{|\mathcal{P}_R|}{n}} + \mathbb{E}\left[\sum_{P \in \mathcal{P} \setminus \mathcal{P}_R} \hat{\mu}_n(P) + \mu(P)\right] \\ &\lesssim \sqrt{\frac{|\mathcal{P}_R|}{n}} + \mu(\mathbb{R}^d \setminus B) \\ &\lesssim \sqrt{\frac{(3\sqrt{2 \log(n)})^d r^{-d}}{n}} + \frac{1}{n} \\ &= \tilde{O}\left(\sqrt{\frac{5^d r^{-d}}{n}}\right),\end{aligned}$$

as desired.  $\square$

**Lemma 9.** *There exists a partition  $\mathcal{P}$  parameterized by  $\delta > 0$  such that, for all  $\mu \in \mathcal{P}(\mathbb{R}^d)$  with  $\mathbb{E}_{\mu}[\|X\|^{p+1}] \leq 1$  and any rounding map  $r_{\mathcal{P}}$ , we have  $\mathbb{E}[\|(r_{\mathcal{P}})_{\#}(\hat{\mu}_n - \mu)\|_{\text{TV}}] = \tilde{O}(\sqrt{\delta^{-d}/n})$  and  $\|r_{\mathcal{P}} - \text{Id}\|_{L^p(\mu)} \lesssim \delta$ .*

886 *Proof.* Let  $X_0$  be a minimal  $(3\delta)$ -covering of the unit ball, denoted  $S_0$ . In particular, this implies  
 887 that  $|X_0| \leq \delta^{-d}$ . Now, take  $\mathcal{P}_0$  to be the Voronoi partition of  $S_0$  induced by  $X_0$ , so that  $\mathcal{P}_0$  has at  
 888 most  $\delta^{-d}$  cells of diameter at most  $6\delta$ . Then for each integer  $i > 0$ , set  $S_i := 2^i S_0 \setminus 2^{i-1} S_0$ , and let  
 889  $\mathcal{P}_i$  be the dilated partition  $\{(2^i P) \cap S_i : P \in \mathcal{P}_0\}$ . By construction,  $|\mathcal{P}_i| \leq \delta^{-d}$  and each  $P \in \mathcal{P}_i$   
 890 has diameter at most  $2^i \cdot 6\delta$ , for all  $i \geq 0$ . Moreover, by Markov's inequality, we have

$$\mu(S_i) \leq \Pr_{\mu}(\|X\| > 2^{i-1}) = \Pr_{\mu}(\|X\|^{p+1} > 2^{(p+1)(i-1)}) \leq 2^{(1-i)(p+1)}$$

891 for each  $i > 0$ . We thus bound

$$\begin{aligned} \mathbb{E}[\|(r_{\mathcal{P}})_{\#}(\mu - \hat{\mu}_n)\|_{\text{TV}}] &= \mathbb{E}\left[\sum_{i=0}^{\infty} \sum_{P \in \mathcal{P}_i} |(\mu - \hat{\mu}_n)(P)|\right] \\ &\leq \sum_{i=0}^{\infty} \sum_{P \in \mathcal{P}_i} \sqrt{\text{Var}_{\mu^{\otimes n}}[\hat{\mu}_n(P)]} \\ &\leq \frac{1}{\sqrt{n}} \cdot \sum_{i=0}^{\infty} \sum_{P \in \mathcal{P}_i} \sqrt{\mu(P)} \\ &\leq \frac{1}{\sqrt{n}} \cdot \sum_{i=0}^{\infty} \sqrt{|\mathcal{P}_i| \mu(S_i)} \\ &\leq (\delta^d n)^{-\frac{1}{2}} \cdot \left(1 + \sum_{i=1}^{\infty} 2^{\frac{1-i}{2}}\right) \\ &\lesssim (\delta^d n)^{-\frac{1}{2}}. \end{aligned}$$

892 Similarly, we bound

$$\begin{aligned} \|r_{\mathcal{P}} - \text{Id}\|_{L^p(\mu)} &\leq \left(\sum_{i=0}^{\infty} \sum_{P \in \mathcal{P}_i} \mu(P) \text{diam}(P)^p\right)^{\frac{1}{p}} \\ &\leq \left(\sum_{i=0}^{\infty} (2^i \cdot 6\delta)^p \mu(S_i)\right)^{\frac{1}{p}} \\ &\lesssim \left(\sum_{i=0}^{\infty} (2^i \delta)^p 2^{(1-i)(p+1)}\right)^{\frac{1}{p}} \\ &= \delta \left(\sum_{i=0}^{\infty} 2^{p+1-i}\right)^{\frac{1}{p}} \\ &\lesssim \delta, \end{aligned}$$

893 as desired. □

894 We now prove a slight strengthening of the theorem which does not explicitly trim the target points,  
 895 i.e., we take  $R = \infty$  so that  $\hat{\nu}_n = \nu'_n$ . We do perform a trimming-type step in our analysis, noting that  
 896 for  $D = \sqrt{4 \log(n)}$ , we have  $\max_{i=1, \dots, n} \|Y_i\| \leq DS$  with probability at least  $1/n$ , by Lemma 7.  
 897 Now, for a general partition  $\mathcal{P}$ , we bound

$$\begin{aligned} \mathcal{E}_p(\hat{\kappa}_n; \mu, \nu) &= \mathcal{E}_p(\bar{\kappa}_n \circ r_{\mathcal{P}}; \mu, \nu) \\ &\leq \mathcal{E}_p(\bar{\kappa}_n; \mu', \nu) + 2 \|r_{\mathcal{P}} - \text{Id}\|_{L^p(\mu)} && \text{(Lemma 5)} \\ &\leq \mathcal{E}_p(\bar{\kappa}_n; \mu', \hat{\nu}_n) + 2 \|r_{\mathcal{P}} - \text{Id}\|_{L^p(\mu)} + \mathcal{W}_p(\nu, \hat{\nu}_n) && \text{(Lemma 2)} \\ &\lesssim \|(r_{\mathcal{P}})_{\#}(\mu - \hat{\mu}_n)\|_{\text{TV}}^{1/p} \cdot \text{diam}(\text{supp}(\hat{\nu}_n)) + \delta^{\frac{1}{p}} + \|r_{\mathcal{P}} - \text{Id}\|_{L^p(\mu)} + \mathcal{W}_p(\nu, \hat{\nu}_n), \end{aligned}$$

where the last inequality follows by Lemma 6 and our choice of  $\bar{\kappa}_n$ . Applying this bound for the regular cube partition and taking expectations, we bound

$$\begin{aligned}\mathbb{E}[\mathcal{E}_p(\hat{\kappa}_n; \mu, \nu)] &\lesssim D \mathbb{E}[\|(r\mathcal{P})_{\#}(\mu - \hat{\mu}_n)\|_{\text{TV}}]^{1/p} + \frac{1}{n} + \delta^{\frac{1}{p}} + \sqrt{d}r + \mathcal{W}_p(\nu, \hat{\nu}_n) \\ &\lesssim \tilde{O}\left(\frac{5^d r^{-d}}{n}\right)^{\frac{1}{2p}} + \delta^{\frac{1}{p}} + \sqrt{d}r + \tilde{O}_p\left(n^{-\frac{1}{d\sqrt{2p}}}\right). \quad (\text{Lemmas 1, 7 and 8})\end{aligned}$$

Taking  $r = n^{-1/(d+2p)}$ , we obtain  $\mathbb{E}[\mathcal{E}_p(\hat{\kappa}_n; \mu, \nu)] = \tilde{O}_{p,d}(n^{-1/(d+2p)}) + \delta^{1/p}$ . The same rate is obtained under bounded  $2p$ th moments by using the alternative partition from Lemma 9. Thus, to achieve the desired rate, it suffices to solve the preliminary OT problem to accuracy  $\delta = n^{-p/(d+2p)}$ .

Computational complexity is dominated by this OT computation. The source and target distributions are both supported on  $n$  points, and we require accuracy  $\delta = n^{-p/(d+2p)}$ . Computing the relevant cost matrix requires time  $O(n^2 d)$ . Using a state of the art OT solver based on entropic OT (e.g., Luo et al., 2023) gives a running time of  $O(C_{\infty} n^2 / \delta) = O(C_{\infty} n^{2+p/(d+2p)})$ , where  $C_{\infty}$  is the largest distance between a source point and a target point.

#### C.4 One-Dimensional Refinements (Remark 3)

In one dimension, OT maps can be expressed concisely in terms of CDFs; in particular, if  $\mu$  and  $\nu$  have strictly increasing CDFs  $F_{\mu}$  and  $F_{\nu}$ , respectively, then the map  $T^*(x) = F_{\nu}^{-1}(F_{\mu}(x))$  solves the  $\mathcal{W}_p(\mu, \nu)$  problem for all  $p \geq 1$ . As a result, many OT-based inference tasks become more analytically tractable when  $d = 1$ , including map estimation. In fact, minor adjustments to folklore techniques imply that the optimal risk of  $n^{-1/(2p)}$  is achievable when  $d = 1$ . We now provide a clean derivation of this risk bound using the Kolmogorov-Smirnov (KS) distance.

The KS distance is a useful alternative to the TV metric in one dimension, defined via  $\|\mu - \nu\|_{\text{KS}} := \sup_{t \in \mathbb{R}} |(\mu - \nu)((-\infty, t])| = \|F_{\mu} - F_{\nu}\|_{\infty}$ . We always have  $\|\mu - \nu\|_{\text{KS}} \leq \|\mu - \nu\|_{\text{TV}}$ , since  $\|\mu - \nu\|_{\text{TV}}$  can alternatively be expressed as  $\sup_{A \text{ meas.}} |(\mu - \nu)(A)|$ . A comparison with  $\mathcal{W}_p$  mirroring Fact 1 is direct.

[proof] **Lemma 10** ( $\mathcal{W}_p$ -KS comparison). *For  $\mu, \nu \in \mathcal{P}([0, D])$ , we have  $\mathcal{W}_p(\mu, \nu) \leq D \|\mu - \nu\|_{\text{KS}}^{1/p}$ .*

*Proof.* Writing  $F, G$  for the CDFs of  $\mu$  and  $\nu$ , with generalized inverses  $F^{-1}$  and  $G^{-1}$ , we bound

$$\begin{aligned}\mathcal{W}_p(\mu, \nu)^p &= \int_0^1 |F^{-1}(u) - G^{-1}(u)|^p du \\ &\leq D^{p-1} \int_0^1 |F^{-1}(u) - G^{-1}(u)| du \\ &= D^{p-1} \int_0^D |F(x) - G(x)| dx \\ &\leq D^p \|\mu - \nu\|_{\text{KS}}.\end{aligned}$$

Taking  $p$ th roots gives the statement.  $\square$

The KS distance admits useful empirical convergence guarantees not shared by the TV distance.

**Fact 2** (KS empirical convergence, Massart, 1990). *For all  $\mu \in \mathcal{P}(\mathbb{R})$ ,  $\mathbb{E}[\|\mu - \hat{\mu}_n\|_{\text{KS}}] \leq 1/\sqrt{n}$ .*

Moreover, for fixed  $\mu$  and  $\nu$ , there exists an optimal kernel for  $\mathcal{W}_p(\mu, \nu)$  (namely, based on CDFs as above), which is near-optimal for all  $\mu'$  in a KS neighborhood of  $\mu$ , as shown next.

[proof] **Lemma 11** (KS corruptions in  $\mu$ ). *For  $\mathcal{X}, \mathcal{Y} \subseteq \mathbb{R}$ , fix  $\mu \in \mathcal{P}(\mathcal{X})$  and  $\nu \in \mathcal{P}(\mathcal{Y})$ . There exists an optimal kernel  $\kappa^* \in \mathcal{K}(\mathcal{X}, \mathcal{Y})$  for the  $\mathcal{W}_p(\mu, \nu)$  problem such that, for all  $\mu' \in \mathcal{P}(\mathcal{X})$ , we have*

$$\mathcal{E}_p(\kappa^*; \mu', \nu) \lesssim \text{diam}(\mathcal{Y}) \|\mu - \mu'\|_{\text{KS}}^{1/p}.$$

*Proof.* Write  $F, F', G$ , for the CDFs of  $\mu, \mu'$ , and  $\nu$ , respectively, and let  $\varepsilon = \|\mu - \mu'\|_{\text{KS}} = \|F - F'\|_{\infty}$ . Write  $D = \text{diam}(\mathcal{Y})$  and suppose without loss of generality that  $\mathcal{Y} = [0, D]$ . For now,

930 suppose further that  $1/\varepsilon = 3M$  is a multiple of 3 (without loss of generality) and that  $F$  is continuous  
 931 (which will be relaxed). We consider the kernel induced by the map  $T^* = G^{-1} \circ F$ , where  $G^{-1}$  is  
 932 the generalized inverse of  $G$  with  $G^{-1}(q)$  defined as 0 for  $q \leq 0$  and  $D$  for  $q \geq 1$ . In particular,  
 933 we compare  $T^*$  with the optimal kernel  $G^{-1} \circ F'$  for the  $W_p(\mu', \nu)$  problem, bounding

$$\begin{aligned} \int_{\mathcal{X}} |G^{-1}(F(x)) - G^{-1}(F'(x))|^p dF'(x) &\leq \int_{\mathcal{X}} |G^{-1}(F'(x) \pm \varepsilon) - G^{-1}(F'(x))|^p dF'(x) \\ &= \int_0^1 |G^{-1}(u \pm \varepsilon) - G^{-1}(u)|^p du \\ &= \sum_{i=0}^{3M-1} \int_{i\varepsilon}^{(i+1)\varepsilon} |G^{-1}(u \pm \varepsilon) - G^{-1}(u)|^p du \\ &\leq \varepsilon \sum_{i=0}^{3M-1} [G^{-1}((i+2)\varepsilon) - G^{-1}((i-1)\varepsilon)]^p. \end{aligned}$$

934 Here, the first equality uses that  $F'_\# \mu' = \text{Unif}([0, 1])$ , and the second inequality uses that  $G^{-1}$  is  
 935 monotonic. If  $F'$  is discontinuous, one should replace it with the kernel  $\tilde{F}'$  which coincides with  
 936  $F'$  where continuous and, at any point  $x$  where there is a jump from  $p_1$  to  $p_2$ , satisfies  $\tilde{F}'_\# \delta_x =$   
 937  $\text{Unif}([p_1, p_2])$ . By this choice, we have  $\tilde{F}'_\# \mu = \text{Unif}([0, 1])$ , and one can do the same for  $F$  to obtain  
 938  $\tilde{F}$  such that  $W_\infty(\tilde{F}_\# \mu, \tilde{F}'_\# \mu) \leq \varepsilon$ . At this point, we can derive the same bound as above. Now, writing  
 939  $\Delta_i = G^{-1}((i+3)\varepsilon) - G^{-1}(i\varepsilon)$ , we have

$$\begin{aligned} \int_{\mathcal{X}} |G^{-1}(F(x)) - G^{-1}(F'(x))|^p dF'(x) &\leq \varepsilon \sum_{i=-1}^{3M-2} \Delta_i^p \\ &= \varepsilon \left( \sum_{i=0}^{M-1} \Delta_{3i-1}^p + \sum_{i=0}^{M-1} \Delta_{3i}^p + \sum_{i=0}^{M-1} \Delta_{3i+1}^p \right) \\ &= \varepsilon D^p \left( \sum_{i=0}^{M-1} \left( \frac{\Delta_{3i-1}}{D} \right)^p + \sum_{i=0}^{M-1} \left( \frac{\Delta_{3i}}{D} \right)^p + \sum_{i=0}^{M-1} \left( \frac{\Delta_{3i+1}}{D} \right)^p \right) \\ &\leq \varepsilon D^p \left( \left( \sum_{i=0}^{M-1} \frac{\Delta_{3i-1}}{D} \right)^p + \left( \sum_{i=0}^{M-1} \frac{\Delta_{3i}}{D} \right)^p + \left( \sum_{i=0}^{M-1} \frac{\Delta_{3i+1}}{D} \right)^p \right) \\ &= O(D\varepsilon^{1/p})^p. \end{aligned}$$

940 Thus, we have  $\mathcal{E}(G^{-1} \circ F; \mu', \nu) \lesssim \|G^{-1} \circ F - G^{-1} \circ F'\|_{L^p(\mu')} \leq D\varepsilon^{1/p}$ , as desired.  $\square$

941 Together, the three results stated above yield our desired risk bound.

942 **Proposition 2.** Let  $X_1, \dots, X_n \stackrel{i.i.d.}{\sim} \mu \in \mathcal{P}(\mathbb{R})$  and  $Y_1, \dots, Y_n \stackrel{i.i.d.}{\sim} \nu \in \mathcal{P}([0, 1])$ . Then the estimator  
 943  $\hat{\kappa}_n$  which, given  $\hat{\mu}_n$  and  $\hat{\nu}_n$ , returns the optimal kernel for  $W_p(\hat{\mu}_n, \hat{\nu}_n)$  given by Lemma [11](#) achieves  
 944 risk  $\mathbb{E}[\mathcal{E}_p(\hat{\kappa}_n; \mu, \nu)] \lesssim n^{-1/(2p)}$ .

945 *Proof.* By Fact [2](#), we have that  $\mathbb{E}[\|\mu - \hat{\mu}_n\|_{\text{KS}}] \leq n^{-1/2}$ . Consequently, we bound

$$\begin{aligned} \mathcal{E}_p(\hat{\kappa}_n; \mu, \nu) &\leq \mathcal{E}_p(\hat{\kappa}_n; \mu, \hat{\nu}_n) + W_p(\nu, \hat{\nu}_n) \\ &\leq \|\mu - \hat{\mu}_n\|_{\text{KS}}^{1/p} + W_p(\nu, \hat{\nu}_n). \end{aligned}$$

946 Taking expectations and applying Fact [2](#) and Lemma [1](#) gives the desired rate.  $\square$

947 Unfortunately, we are unaware of any multivariate extension of the KS distance that obeys a useful  
 948 comparison inequality with  $W_p$  (like Fact [10](#)) while maintaining strong empirical convergence  
 949 guarantees (like Fact [2](#)), inhibiting the further development of this approach.



## D Additional Details for Section 4

We note that the minimax lower bounds in Corollaries 1 and 2 follow by combining the reduction to distribution estimation from Appendix C.2 with existing lower bounds for distribution estimation under  $W_p$  from Singh and Póczos [2018] and Weed and Berthet [2019], respectively.

## E Proofs for Section 5

We first recall some basic facts used throughout.

**Fact 3** (TV contraction under Markov kernels). For  $\mu, \nu \in \mathcal{P}(\mathcal{X})$  and kernel  $\kappa \in \mathcal{K}(\mathcal{X}, \mathcal{Y})$ , we have  $\|\kappa_\# \mu - \kappa_\# \nu\|_{\text{TV}} \leq \|\mu - \nu\|_{\text{TV}}$ .

This follows by the data processing inequality.

**Fact 4** ( $W_p$  contraction under convolution). For  $\mu, \nu, \alpha \in \mathcal{P}(\mathcal{X})$ , we have  $W_p(\mu * \alpha, \nu * \alpha) \leq W_p(\mu, \nu)$ , where  $*$  denotes convolution between probability measures.

This follows by considering the couplings  $(X + Z, Y + Z')$  of  $\mu * \alpha$  and  $\nu * \alpha$  which set  $Z = Z'$ .

**Fact 5** (TV discrete empirical convergence). For a finite set  $S$  with  $|S| = k$ , any distribution  $\mu \in \Delta(S)$  exhibits empirical convergence in TV at rate  $\mathbb{E}[\|\hat{\mu}_n - \mu\|_{\text{TV}}] \lesssim \sqrt{k/n}$ .

To simplify discussion of our corruption model, we employ the  $\varepsilon$ -outlier-robust  $p$ -Wasserstein distance

$$W_p^\varepsilon(\mu, \nu) := \min_{\substack{\mu' \in \mathcal{P}(\mathbb{R}^d) \\ \|\mu' - \mu\|_{\text{TV}} \leq \varepsilon}} W_p(\mu', \nu) = \min_{\substack{\nu' \in \mathcal{P}(\mathbb{R}^d) \\ \|\nu' - \nu\|_{\text{TV}} \leq \varepsilon}} W_p(\mu, \nu'). \quad (8)$$

The second equality follows from the observation that, if  $\mathbb{E}[\|X' - Y\|^p] \leq c$  and  $X = X'$  with probability at least  $1 - \varepsilon$ , then the random variable  $Y' = Y\mathbb{1}\{X = X'\} + X\mathbb{1}\{X \neq X'\}$  satisfies  $\mathbb{E}[\|X - Y'\|^p] \leq c$ . See Nietert et al. [2023a] for a thorough examination of  $W_p^\varepsilon$  in the context of robust statistics. Under the setting of Section 5, our corruption model can be equivalently stated as follows: given the standard empirical measures  $\hat{\mu}_n \in \mathcal{P}(\mathcal{X})$  and  $\hat{\nu}_n \in \mathcal{P}(\mathcal{Y})$ , we observe corrupted versions  $\tilde{\mu}_n \in \mathcal{P}(\mathcal{X})$  and  $\tilde{\nu}_n \in \mathcal{P}(\mathcal{Y})$  such that  $W_p^\varepsilon(\tilde{\mu}_n, \hat{\mu}_n) \vee W_p^\varepsilon(\tilde{\nu}_n, \hat{\nu}_n) \leq \rho$ .

For this setting, we handle sampling error using the following lemma, which mirrors Lemma 8.

**Lemma 12** (Prop. 2 of Goldfeld et al. [2020]). Fix  $\sigma > 0$  and 1-sub-Gaussian  $\mu \in \mathcal{P}(\mathbb{R}^d)$ . Then, the  $n$ -sample empirical measure  $\hat{\mu}_n$  satisfies  $\mathbb{E}[\|N_\#^\sigma(\mu - \hat{\mu}_n)\|_{\text{TV}}] \leq \sqrt{3^d(1 \vee \sigma^{-d})/n}$ .

In order to apply our  $W_p$  stability result, Lemma 3, we use that any kernel become continuous if one first applies Gaussian convolution.

**Lemma 13.** Fix  $\bar{\kappa} \in \mathcal{K}(\mathcal{X}, \mathcal{Y})$ ,  $\sigma > 0$ , and let  $\kappa = \bar{\kappa} \circ N^\sigma$ . Then, for all  $x, x' \in \mathcal{X}$ , we have  $W_p((\kappa_x, \kappa_{x'}) \leq \text{diam}(\mathcal{Y})[\|x - x'\|/(2\sigma)]^{1/p}$ .

*Proof.* We simply compute

$$\begin{aligned} W_p(\kappa_x, \kappa_{x'}) &\leq \text{diam}(\mathcal{Y}) \|\kappa_\#(N_x^\sigma - N_{x'}^\sigma)\|_{\text{TV}}^{1/p} && \text{(Fact 1)} \\ &\leq \text{diam}(\mathcal{Y}) \|N_x^\sigma - N_{x'}^\sigma\|_{\text{TV}}^{1/p} && \text{(data processing ineq.)} \\ &\leq \text{diam}(\mathcal{Y}) \|\mathcal{N}(x, \sigma^2 I_d) - \mathcal{N}(x', \sigma^2 I_d)\|_{\text{TV}}^{1/p} \\ &\leq \text{diam}(\mathcal{Y}) \|x - x'\|^{1/p} (2\sigma)^{-1/p}, \end{aligned}$$

where the final inequality follows by the closed form of KL divergence between Gaussians, combined with Pinsker's inequality.  $\square$

We split the proof of Theorem 4 into the upper bound (Appendix E.1) and lower bound (Appendix E.2).

## 982 E.1 Proof of Theorem 4 (Upper Bound)

983 To start, we decompose  $N^\sigma = N^{\sigma_1 + \sigma_2} = N^{\sigma_1} \circ N^{\sigma_2}$ , for  $\sigma_1, \sigma_2$  to be tuned later. By our  
 984 corruption model, there exists an intermediate measure  $\mu'_n \in \mathcal{P}(\mathbb{R}^d)$  such that  $\|\hat{\mu}_n - \mu'_n\|_{\text{TV}} \leq$   
 985  $\varepsilon$  and  $W_p(\mu'_n, \tilde{\mu}_n) \leq \rho$ . By Facts 3 and 4, these bounds are preserved under convolution, so  
 986  $\|N_{\#}^{\sigma_1}(\hat{\mu}_n - \mu'_n)\|_{\text{TV}} \leq \varepsilon$  and  $W_p(N_{\#}^{\sigma_1}\mu'_n, N_{\#}^{\sigma_1}\tilde{\mu}_n) \leq \rho$ . By the TV triangle inequality, we have  
 987  $\|N_{\#}^{\sigma_1}(\mu - \mu'_n)\|_{\text{TV}} \leq \tau := \varepsilon + \|N_{\#}^{\sigma_1}(\mu - \hat{\mu}_n)\|_{\text{TV}}$ . We conclude that  $W_p^\tau(N_{\#}^{\sigma_1}\tilde{\mu}_n, N_{\#}^{\sigma_1}\mu) \leq \rho$ .  
 988 By the symmetric nature of  $W_p^\tau$ , there must also exist  $\alpha \in \mathcal{P}(\mathbb{R}^d)$  such that  $W_p(N_{\#}^{\sigma_1}\mu, \alpha) \leq \rho$  and  
 989  $\|\alpha - N_{\#}^{\sigma_1}\tilde{\mu}_n\|_{\text{TV}} \leq \tau$ .

990 Now set  $\bar{\kappa} = \kappa_p^*[N_{\#}^{\sigma}\tilde{\mu}_n \rightarrow \tilde{\nu}_n]$ , so that  $\mathcal{E}_p(\bar{\kappa}; N_{\#}^{\sigma}\tilde{\mu}_n, \tilde{\nu}_n) = 0$ . Using this, the TV bound above,  
 991 and the fact that  $N_{\#}^{\sigma}\tilde{\mu}_n = N_{\#}^{\sigma_2}(N_{\#}^{\sigma_1}\tilde{\mu}_n)$ , we have  $\mathcal{E}_p(\bar{\kappa}; N_{\#}^{\sigma_2}\alpha, \tilde{\nu}_n) \lesssim \text{diam}(\mathcal{Y})\tau^{1/p} \leq \sqrt{d}\tau^{1/p}$ .  
 992 Applying Lemma 5, this gives

$$\mathcal{E}_p(\bar{\kappa} \circ N^{\sigma_2}; \alpha, \tilde{\nu}_n) \lesssim \sqrt{d}\tau^{\frac{1}{p}} + \mathbb{E}_{Z \sim N(0, \sigma_2^2 I_d)}[\|Z\|^p]^{\frac{1}{p}} \lesssim \sqrt{d}\tau^{\frac{1}{p}} + \sqrt{d+p}\sigma_2.$$

993 Consequently, by Lemma 3 and Lemma 13, we have that

$$\begin{aligned} \mathcal{E}_p(\bar{\kappa} \circ N^{\sigma_2}; N_{\#}^{\sigma_1}\mu, \tilde{\nu}_n) &\lesssim \mathcal{E}_p(\bar{\kappa} \circ N^{\sigma_2}; \alpha, \tilde{\nu}_n) + \rho + (\sqrt{d}/\sigma_2)^{1/p}\rho^{1/p} \\ &\lesssim \mathcal{E}_p(\bar{\kappa} \circ N^{\sigma_2}; \alpha, \tilde{\nu}_n) + \rho + (\sqrt{d}/\sigma_2)^{1/p}\rho^{1/p} \\ &\leq \sqrt{d}\tau^{\frac{1}{p}} + \rho + (\sqrt{d}/\sigma_2)^{1/p}\rho^{1/p} + \sqrt{d+p}\sigma_2. \end{aligned}$$

994 Tuning  $\sigma_2$  gives

$$\mathcal{E}_p(\bar{\kappa} \circ N^{\sigma_2}; N_{\#}^{\sigma_1}\mu, \tilde{\nu}_n) \lesssim \sqrt{d}\tau^{\frac{1}{p}} + \sqrt{d}\rho^{\frac{1}{p+1}} + \rho.$$

995 Apply Lemma 5 once more, we bound

$$\begin{aligned} \mathcal{E}_p(\bar{\kappa} \circ N^{\sigma}; \mu, \tilde{\nu}_n) &\lesssim \sqrt{d}\tau^{\frac{1}{p}} + \sqrt{d}\rho^{\frac{1}{p+1}} + \rho + \sqrt{d+p}\sigma_1 \\ &\lesssim \sqrt{d}\varepsilon^{\frac{1}{p}} + \sqrt{d}\rho^{\frac{1}{p+1}} + \rho + \sqrt{d+p}\sigma_1 + \sqrt{d}\|N_{\#}^{\sigma_1}(\mu - \hat{\mu}_n)\|_{\text{TV}}^{1/p} \end{aligned}$$

996 Taking expectations and applying Lemma 12 yields

$$\begin{aligned} \mathbb{E}[\mathcal{E}_p(\bar{\kappa} \circ N^{\sigma}; \mu, \tilde{\nu}_n)] &\lesssim \sqrt{d}\varepsilon^{\frac{1}{p}} + \sqrt{d}\rho^{\frac{1}{p+1}} + \rho + \sqrt{d+p}\sigma_1 + \mathbb{E}[\|N_{\#}^{\sigma_1}(\mu - \hat{\mu}_n)\|_{\text{TV}}]^{1/p} \\ &\lesssim \sqrt{d}\varepsilon^{\frac{1}{p}} + \sqrt{d}\rho^{\frac{1}{p+1}} + \rho + \sqrt{d+p}\sigma_1 + \left(\frac{3^d(1 \vee \sigma^{-d})}{n}\right)^{\frac{1}{2p}}. \end{aligned}$$

997 Tuning  $\sigma_1$  then gives

$$\mathbb{E}[\mathcal{E}_p(\bar{\kappa} \circ N^{\sigma}; \mu, \tilde{\nu}_n)] \lesssim \sqrt{d}\varepsilon^{\frac{1}{p}} + \sqrt{d}\rho^{\frac{1}{p+1}} + \rho + O_{p,d}(n^{-\frac{1}{d+2p}}).$$

998 Finally, we note that  $W_p(\tilde{\nu}_n, \hat{\nu}_n) \leq \rho + \sqrt{d}\varepsilon^{1/p}$  due to the support bound. Thus, Lemma 2 gives

$$\begin{aligned} \mathbb{E}[\mathcal{E}_p(\bar{\kappa} \circ N^{\sigma}; \mu, \nu)] &\leq \mathbb{E}[\mathcal{E}_p(\bar{\kappa} \circ N^{\sigma}; \mu, \tilde{\nu}_n) + W_p(\tilde{\nu}_n, \hat{\nu}_n) + W_p(\hat{\nu}_n, \nu)] \\ &\leq \mathbb{E}[\mathcal{E}_p(\bar{\kappa} \circ N^{\sigma}; \mu, \tilde{\nu}_n)] + \rho + \sqrt{d}\varepsilon^{\frac{1}{p}} + \mathbb{E}[W_p(\hat{\nu}_n, \nu)] \\ &\lesssim \sqrt{d}\varepsilon^{\frac{1}{p}} + \sqrt{d}\rho^{\frac{1}{p+1}} + \rho + O_{p,d}(n^{-\frac{1}{d+2p}}), \end{aligned}$$

999 as desired.

1000 For the null estimator, let  $\kappa^*$  be an optimal kernel for the  $W_p(\mu, \nu)$  problem and bound

$$\begin{aligned} \mathcal{E}(\hat{\kappa}_{\text{null}}; \mu, \nu) &= \left[ \left( \int \|x\|^p d\mu(x) \right)^{\frac{1}{p}} - \left( \iint \|y - x\|^p d\kappa_x^*(y) d\mu(x) \right)^{\frac{1}{p}} \right]_+ + W_p(\delta_0, \nu) \\ &\leq \left[ \left( \iint \|y\|^p d\kappa_x^*(y) d\mu(x) \right)^{\frac{1}{p}} \right]_+ + W_p(\delta_0, \nu) \quad (\text{Minkowski's inequality}) \\ &\leq 2\sqrt{d}, \quad (\mathcal{Y} \subseteq [0, 1]^d) \end{aligned}$$

1001 as desired.

## 1002 E.2 Proof of Theorem 4 (Lower Bound)

1003 **Correction:** Our current lower bound construction does not fully match the claim in the statement  
 1004 of Theorem 4. Rather, we prove the weaker bound of  $\sqrt{d}\varepsilon^{1/p} + \rho^{1/2}d^{1/4} \wedge \sqrt{d} + n^{-1/(d\vee 2p)}$ . Still,  
 1005 this is sufficient to establish the separation between distribution estimation and kernel estimation  
 1006 discussed after the theorem.

1007 We inherit the  $n^{-1/(d\vee 2p)}$  sampling error term of the lower bound from the Dirac mass construction  
 1008 described in Appendix C.2. For the remaining terms, we prove lower bounds which hold even in  
 1009 the infinite-sample population limit, and even when only the source measure is corrupted. Here,  
 1010 an estimator can be viewed as a map  $\hat{\kappa}$  from  $\mathcal{P}(\mathcal{X}) \times \mathcal{P}(\mathcal{Y}) \rightarrow \mathcal{K}(\mathcal{X}, \mathcal{Y})$ , mapping the corrupted  
 1011 source measure  $\mu$ , guaranteed to satisfy  $W_p^\varepsilon(\tilde{\mu}, \mu) \leq \rho$ , and the clean target measure  $\nu$  to a kernel  
 1012 estimate  $\hat{\kappa}[\tilde{\mu}, \nu]$ . For  $\mathcal{X} = \mathbb{B}^d$  (which, in particular, forces each  $\mu \in \mathcal{P}(\mathcal{X})$  to be 1-sub-Gaussian) and  
 1013  $\mathcal{Y} = [-1, 1]^d$ , we prove that

$$\sup_{\substack{\mu \in \mathcal{P}(\mathcal{X}) \\ \nu \in \mathcal{P}(\mathcal{Y})}} \sup_{\substack{\tilde{\mu} \in \mathcal{P}(\mathcal{X}) \\ W_p^\varepsilon(\tilde{\mu}, \mu) \leq \rho}} \mathcal{E}_p(\hat{\kappa}[\tilde{\mu}, \nu]; \mu, \nu) \gtrsim \sqrt{d}\varepsilon^{1/p} + \rho^{1/2}d^{1/4} \wedge \sqrt{d}.$$

1014 The choice of  $\mathcal{Y} = [-1, 1]^d$  rather than  $[0, 1]^d$  is solely to simplify notation in one of our constructions  
 1015 and can be reverted without loss. Finally, it suffices to lower bound the supremum by  $\sqrt{d}\varepsilon^{1/p}$  when  
 1016  $\rho = 0$  and  $\sqrt{d\rho} \wedge \sqrt{d}$  when  $\varepsilon = 0$ , separately, which we do presently.

1017 **TV lower bound.** Fix target measure  $\nu = (1 - \varepsilon)\delta_0 + \varepsilon\delta_y$ , where  $y = (1, \dots, 1) \in \mathbb{R}^d$ . Consider  
 1018 the candidate clean measures  $\mu_1 = \nu$  and  $\mu_2 = \delta_0$ . Because they are within TV distance  $\varepsilon$ , the  
 1019 observation  $\tilde{\mu} = \nu$  is compatible with both candidates. Abbreviating  $\kappa = \hat{\kappa}[\tilde{\mu}, \nu]$ , we have

$$\begin{aligned} \mathcal{E}_p(\kappa; \mu_1, \nu) + \mathcal{E}_p(\kappa; \mu_2, \nu) &\geq \left[ \left( \iint \|y - x\|^p d\kappa_x(y) \mu_1(x) \right)^{\frac{1}{p}} - W_p(\mu_1, \nu) \right]_+ + W_p(\kappa_\# \mu_2, \nu) \\ &= \left( \iint \|y - x\|^p d\kappa_x(y) \nu(x) \right)^{\frac{1}{p}} + W_p(\kappa_\# \delta_0, \nu) \\ &\geq (1 - \varepsilon)^{\frac{1}{p}} \left( \int \|y\|^p d\kappa_0(y) \right)^{\frac{1}{p}} + W_p(\kappa_\# \delta_0, \nu) \\ &\geq (1 - \varepsilon)^{\frac{1}{p}} W_p(\kappa_\# \delta_0, \delta_0) + (1 - \varepsilon)^{\frac{1}{p}} W_p(\kappa_\# \delta_0, \nu) \\ &\geq (1 - \varepsilon)^{\frac{1}{p}} W_p(\delta_0, \nu) \\ &\geq (1 - \varepsilon)^{\frac{1}{p}} \varepsilon^{\frac{1}{p}} \sqrt{d} \\ &\geq \frac{1}{2} \varepsilon^{\frac{1}{p}} \sqrt{d}. \end{aligned}$$

1020 Thus, we must have  $\mathcal{E}_p(\kappa; \mu_1, \nu) \vee \mathcal{E}_p(\kappa; \mu_2, \nu) \gtrsim \sqrt{d}\varepsilon^{1/p}$ , as desired.

1021  **$W_p$  lower bound.** For the remaining bound, we first argue that, for any kernel  $\kappa$ , its performance  
 1022 for the  $W_p(\mu, \nu)$  problem cannot suffer too much if we compose it with the Euclidean projection onto  
 1023  $\text{supp}(\nu)$ , denoted by  $\text{proj}_{\text{supp}(\nu)}$ .

1024 **Lemma 14.** For  $\mu \in \mathcal{P}(\mathcal{X})$ ,  $\nu \in \mathcal{P}(\mathcal{Y})$ , and  $\kappa \in \mathcal{K}(\mathcal{X}, \mathcal{Y})$ , we have

$$\mathcal{E}_p(\text{proj}_{\text{supp}(\nu)} \circ \kappa; \mu, \nu) \leq 4\mathcal{E}_p(\kappa; \mu, \nu).$$

1025 *Proof.* Write  $f = \text{proj}_{\text{supp}(\nu)}$  and  $\varepsilon = \mathcal{E}_p(\kappa; \mu, \nu)$ . Fix a coupling  $X, Y, Z$  such that  $(X, Z) \sim$   
 1026  $(\text{Id}, \kappa)_\# \mu$ ,  $Y \sim \nu$ , and  $\mathbb{E}[\|Z - Y\|^p] = W_p(\kappa_\# \mu, \nu)^p \leq \varepsilon^p$ . Taking  $Z' = f(Z)$ , we then bound

$$\begin{aligned} \mathbb{E}[\|X - Z'\|^p]^{1/p} &\leq \mathbb{E}[\|X - Z\|^p]^{1/p} + \mathbb{E}[\|Z - Z'\|^p]^{1/p} \\ &= \mathbb{E}[\|X - Z\|^p]^{1/p} + \mathbb{E}[\|Z - f(Z)\|^p]^{1/p} \\ &\leq W_p(\mu, \nu) + \varepsilon + \mathbb{E}[\|Z - Y\|^p]^{1/p} \\ &\leq W_p(\mu, \nu) + 2\varepsilon. \end{aligned}$$

1027 Similarly, we have

$$\begin{aligned} W_p(\kappa'_\# \mu, \nu) &\leq \mathbb{E}[\|Z' - Y\|^p]^{1/p} \\ &\leq \mathbb{E}[\|Z - Y\|^p]^{1/p} + \mathbb{E}[\|Z - Z'\|^p]^{1/p} \\ &\leq \varepsilon + \varepsilon = 2\varepsilon. \end{aligned}$$

1028 Thus, the sum of these two errors is at most  $4\varepsilon$ , as desired.  $\square$

1029 Now, fix target measure  $\nu = \frac{1}{2}\delta_{-y} + \frac{1}{2}\delta_y$ , where  $y = (1, \dots, 1)$ , and take  $c \in [0, 1]$  to be tuned  
 1030 later. Then, for each  $0 \leq t \leq 1/2$ , define measure  $\mu_t = (1/2 - t)\delta_{-cy} + (1/2 + t)\delta_{+cy}$ . Now,  
 1031 fix any kernel  $\kappa \in \mathcal{K}(\mathcal{X}, \{\pm y\})$ , where the codomain restriction is without loss of generality due  
 1032 to Lemma 14. Note that its performance on each  $\mu_t$  is determined by the two-point distributions  
 1033  $\kappa_\pm := \kappa_{\pm cy} = (1 - \alpha_\pm)\delta_{-cy} + \alpha_\pm\delta_{cy}$ . In particular, for  $0 \leq t < 1/2$ , we compute

$$\begin{aligned} W_p(\mu_t, \nu)^p &= \left(\frac{1}{2} - t\right)(1 - c)^p \|y\|^p + t(1 + c)^p \|y\|^p + \frac{1}{2}(1 - c)^p \|y\|^p \\ &= d^{\frac{p}{2}} [(1 - t)(1 - c)^p + t(1 + c)^p], \\ W_p(\kappa_\# \mu_t, \nu)^p &= W_p\left(\left(\frac{1}{2} - t\right)\kappa_- + \left(\frac{1}{2} + t\right)\kappa_+, \nu\right)^p \\ &= \|y - (-y)\|^p \cdot W_p\left(\left(\frac{1}{2} - t\right)\text{Ber}(\alpha_-) + \left(\frac{1}{2} + t\right)\text{Ber}(\alpha_+), \text{Ber}\left(\frac{1}{2}\right)\right)^p \\ &= (2d)^{\frac{p}{2}} W_p\left(\text{Ber}\left(\left(\frac{1}{2} - t\right)\alpha_- + \left(\frac{1}{2} + t\right)\alpha_+\right), \text{Ber}\left(\frac{1}{2}\right)\right)^p \\ &= (2d)^{\frac{p}{2}} \left|\left(\frac{1}{2} - t\right)\alpha_- + \left(\frac{1}{2} + t\right)\alpha_+ - \frac{1}{2}\right|, \\ W_p(\delta_{cy}, \kappa_+)^p &= \alpha_+(1 - c)^p \|y\|^p + (1 - \alpha_+)(1 + c)^p \|y\|^p \\ &= d^{\frac{p}{2}} (\alpha_+(1 - c)^p + (1 - \alpha_+)(1 + c)^p), \\ W_p(\delta_{-cy}, \kappa_-)^p &= \alpha_-(1 + c)^p \|y\|^p + (1 - \alpha_-)(1 - c)^p \|y\|^p \\ &= d^{\frac{p}{2}} (\alpha_-(1 + c)^p + (1 - \alpha_-)(1 - c)^p), \\ \iint \|y - x\|^p d\kappa_x(y) d\mu_t(x) &= \left(\frac{1}{2} - t\right)W_p(\delta_{-cy}, \kappa_-)^p + \left(\frac{1}{2} + t\right)W_p(\delta_{cy}, \kappa_+)^p \\ &= d^{\frac{p}{2}} \left[\left(\frac{1}{2} - t\right)(\alpha_-(1 + c)^p + (1 - \alpha_-)(1 - c)^p) \right. \\ &\quad \left. + \left(\frac{1}{2} + t\right)(\alpha_+(1 - c)^p + (1 - \alpha_+)(1 + c)^p)\right]. \end{aligned}$$

1034 Writing  $\Delta = \alpha_- - \alpha_+$ , we next bound

$$\begin{aligned} &W_p(\kappa_\# \mu_t, \nu) + W_p(\kappa_\# \mu_0, \nu) \\ &= \sqrt{2d} \left| \left(\frac{1}{2} - t\right)\alpha_- + \left(\frac{1}{2} + t\right)\alpha_+ - \frac{1}{2} \right|^{\frac{1}{p}} + \sqrt{2d} \left| \frac{1}{2}\alpha_- + \frac{1}{2}\alpha_+ - \frac{1}{2} \right|^{\frac{1}{p}} \\ &\geq \sqrt{2d} t^{\frac{1}{p}} |\alpha_+ - \alpha_-|^{\frac{1}{p}} \quad (\text{subadditivity of } a \mapsto a^{1/p}) \\ &= \sqrt{2d} t^{\frac{1}{p}} |\Delta|^{\frac{1}{p}} \end{aligned}$$

1035 and we simplify

$$\begin{aligned} \iint \|y - x\|^p d\kappa_x(y) d\mu_0(x) &= d^{\frac{p}{2}} \left( \frac{1 + \alpha_- - \alpha_+}{2} (1 + c)^p + \frac{1 - \alpha_- + \alpha_+}{2} (1 - c)^p \right) \\ &= d^{\frac{p}{2}} \left( \frac{1 + \Delta}{2} (1 + c)^p + \frac{1 - \Delta}{2} (1 - c)^p \right) \\ W_p(\mu_0, \nu) &= \sqrt{d} (1 - c). \end{aligned}$$

1036 Thus, we further bound

$$\begin{aligned} &\left[ \left( \iint \|y - x\|^p d\kappa_x(y) d\mu_0(x) \right)^{\frac{1}{p}} - W_p(\mu_0, \nu) \right]_+ \\ &= \sqrt{d} \left[ \left( \frac{1 + \Delta}{2} (1 + c)^p + \frac{1 - \Delta}{2} (1 - c)^p \right)^{\frac{1}{p}} - 1 + c \right]_+ \\ &= \sqrt{d} \left[ \left( \frac{1 + \Delta}{2} (1 + c)^p + \frac{1 - \Delta}{2} (1 - c)^p \right)^{\frac{1}{p}} - 1 + c \right]. \end{aligned}$$

---

**Algorithm 1:** Randomized Rounding for Efficient OT Kernel Estimation

---

**Input:**  $n$  corrupted source points  $S \subseteq \mathbb{R}^d$  and target points  $T \subseteq [0, 1]^d$ , budgets  $\rho \geq 0, \varepsilon \in [0, 1]$

1:  $m \leftarrow n^2, \tau \leftarrow n^{-1/(d+2)}, \sigma \leftarrow 3^{d/(2+d)}(nd)^{-1/(d+2)} + \rho^{1/2}d^{-1/4}$

2:  $S' \leftarrow \{\text{proj}_S(X'_i + Z_i)\}_{i=1}^m$ , where each  $X'_i \sim S$  and  $Z_i \sim \mathcal{N}_\sigma$  are sampled independently

3: Compute kernel  $\bar{\kappa} \in \mathcal{K}(S', T)$  s.t.  $\bar{\kappa}_\# \text{Unif}(S') = \text{Unif}(T)$

$$\frac{1}{m} \sum_{x \in S'} \int \|x - y\| d\bar{\kappa}(y|x) \leq W_1(S', T) + \tau$$

4: Return  $\hat{\kappa} \in \mathcal{K}(\mathbb{R}^d, T)$  defined by  $\hat{\kappa} = \bar{\kappa} \circ \text{proj}_S \circ N^\sigma$

---

1037 Combining, this gives

$$\begin{aligned} & \mathcal{E}_p(\kappa; \mu_t, \nu) + \mathcal{E}_p(\kappa; \mu_0, \nu) \\ & \geq \left[ \sqrt{d} \left( \frac{1+\Delta}{2} (1+c)^p + \frac{1-\Delta}{2} (1-c)^p \right)^{\frac{1}{p}} - 1 + c + \sqrt{2d} t^{\frac{1}{p}} |\Delta|^{\frac{1}{p}} \right] \\ & \geq \left[ \sqrt{d} \left( \frac{1+\Delta}{2} (1+c) + \frac{1-\Delta}{2} (1-c) \right) - 1 + c + \sqrt{2d} t^{\frac{1}{p}} |\Delta|^{\frac{1}{p}} \right] \\ & = \left[ \sqrt{dc}(\Delta + 1) + \sqrt{2d} t^{\frac{1}{p}} |\Delta|^{\frac{1}{p}} \right] \\ & \geq \sqrt{d} \left[ c(1 - |\Delta|) + t^{1/p} |\Delta| \right] \\ & \geq \sqrt{d} \min\{c/2, t^{1/p}/2\} \end{aligned}$$

1038 Now, supposing that  $\rho < \sqrt{d}$ , we can safely take  $c = t^{1/p} = \rho^{1/2}d^{-1/4}/2$  while ensuring that  
 1039  $c \in [0, 1]$  and  $t \in [0, 1/2]$ , which were the only constraints on our construction. Otherwise, we take  
 1040  $c = t^{1/p} = 1/2$ . In either case, we have  $W_p(\mu_0, \mu_t) = t^{1/p} \cdot 2c\sqrt{d} = (\rho \wedge \sqrt{d})/2 \leq \rho$ . Thus, the  
 1041 observation  $\tilde{\mu} = \mu_0$  is compatible with both  $\mu = \mu_0$  and  $\mu_t$  under our corruption model. This gives  
 1042 the desired minimax lower bound of  $\Omega(\sqrt{dc} \wedge t^{1/p}) = \Omega(d^{1/4} \rho^{1/2} \wedge \sqrt{d})$ .

### 1043 E.3 Efficient Computation

1044 We now introduce Algorithm 1 to achieve efficient computation, focusing on  $p = 1$  where we match  
 1045 the rate of Theorem 4. Here, we identify finite sets with their uniform distributions when convenient.

1046 **Theorem 5** (Efficient implementation). *Under the setting of Section 5 with  $p = 1$ , the kernel  $\hat{\kappa}$   
 1047 returned by Algorithm 1 matches the risk bound of Theorem 4. Using an entropic OT solver for Step  
 1048 3, Algorithm 1 runs in time  $O((C_\infty + d)n^{2+o_d(1)})$ , where  $C_\infty = \max_{i,j} \|\tilde{X}_i - \tilde{Y}_j\|$ . Moreover,  $\hat{\kappa}$   
 1049 can be evaluated (i.e., given  $x \in \mathcal{X}$  we can sample  $Y \sim \hat{\kappa}_x$ ) in time  $O(nd)$ .*

1050 The proof below employs a similar analysis to that of Theorem 4, with multiple applications of  
 1051 Lemma 4 to account for various sampling errors along with TV contamination. We restrict to  $p = 1$   
 1052 due to the worsened scaling of Lemma 4 for  $p > 1$ .

1053 *Proof.* Set  $\alpha = N_\#^\sigma \tilde{\mu}_n$ ,  $\beta = \text{proj}_S \alpha$ , and  $\beta_m = \text{Unif}(S')$ . By construction,  $S'$  is sampled i.i.d.  
 1054 from  $\beta$ , so Fact 5 gives that  $\mathbb{E}[\|\beta - \beta_m\|_{\text{TV}}] = \mathbb{E}[\mathbb{E}[\|\beta - \beta_m\|_{\text{TV}} | S']] \lesssim \sqrt{n/m}$ . Moreover,

$$\begin{aligned} \int \|\text{proj}_S(x) - x\| d\alpha(x) &= \frac{1}{n} \sum_{x \in S} \int \|\text{proj}_S(x+z) - x+z\| dN^\sigma(z) \\ &\leq \frac{1}{n} \sum_{x \in S} \int \|x - x+z\| dN^\sigma(z) & (x \in S) \\ &= \int \|z\| dN^\sigma(z) \\ &\lesssim \sqrt{d} \sigma. \end{aligned}$$

Now, we restate our guarantee for  $\bar{\kappa}$ ; namely, we have:

$$\iint \|x - y\| d\bar{\kappa}(y|x) d\beta_m(x) \leq W_1(\beta_m, \tilde{\nu}_n) + \tau.$$

Thus, by Lemma 6, we have

$$\mathcal{E}_1(\bar{\kappa}; \beta, \tilde{\nu}_n) \lesssim \tau + \sqrt{d} \|\beta - \beta_m\|_{TV},$$

and, applying Lemma 5 we obtain

$$\mathcal{E}_1(\bar{\kappa} \circ \text{proj}_S; \alpha, \tilde{\nu}_n) \lesssim \tau + \sqrt{d} \|\beta - \beta_m\|_{TV} + \sqrt{d} \sigma.$$

Now, write  $\mu'_n \in \mathcal{P}(\mathbb{R}^d)$  for an intermediate measure such that  $\|\mu'_n - \tilde{\mu}_n\|_{TV} \leq \varepsilon$  and  $W_p(\mu'_n, \hat{\mu}_n) \leq \rho$ . Noting that  $\alpha = N_{\#}^{\sigma} \tilde{\mu}_n$ , we have by Fact 3 that  $\|\alpha - N_{\#}^{\sigma} \mu'_n\|_{TV} \leq \varepsilon$ . Thus, Lemma 4 gives

$$\mathcal{E}_1(\bar{\kappa} \circ \text{proj}_S; N_{\#}^{\sigma} \mu'_n, \tilde{\nu}_n) \lesssim \sqrt{d} \varepsilon + \tau + \sqrt{d} \|\beta - \beta_m\|_{TV} + \sqrt{d} \sigma.$$

Applying Lemma 5 once more, we obtain

$$\mathcal{E}_1(\bar{\kappa} \circ \text{proj}_S \circ N^{\sigma/2}; N_{\#}^{\sigma/2} \mu'_n, \tilde{\nu}_n) \lesssim \sqrt{d} \varepsilon + \tau + \sqrt{d} \|\beta - \beta_m\|_{TV} + \sqrt{d} \sigma.$$

By Lemma 13, the fact that this latest kernel begins with the convolution  $N^{\sigma/2}$  ensures that it is  $O(\sqrt{d}\sigma^{-1})$ -Lipschitz w.r.t.  $W_1$ . Moreover, by Fact 4, we have  $W_1(N_{\#}^{\sigma/2} \mu'_n, N_{\#}^{\sigma/2} \hat{\mu}_n) \leq W_1(\mu'_n, \hat{\mu}_n) \leq \rho$ . Thus, Lemma 3 gives

$$\mathcal{E}_1(\bar{\kappa} \circ \text{proj}_S \circ N^{\sigma/2}; N_{\#}^{\sigma/2} \hat{\mu}_n, \tilde{\nu}_n) \lesssim \sqrt{d} \varepsilon + \tau + \sqrt{d} \|\beta - \beta_m\|_{TV} + \sqrt{d} \sigma + \rho + \frac{\sqrt{d} \rho}{\sigma}.$$

Next, we apply Lemma 4 and Lemma 5 to bound

$$\begin{aligned} & \mathcal{E}_1(\bar{\kappa} \circ \text{proj}_S \circ N^{\sigma}; \mu, \tilde{\nu}_n) \\ & \lesssim \mathcal{E}_1(\bar{\kappa} \circ \text{proj}_S \circ N^{\sigma/2}; N_{\#}^{\sigma/2} \mu, \tilde{\nu}_n) + \sqrt{d} \sigma \\ & \lesssim \mathcal{E}_1(\bar{\kappa} \circ \text{proj}_S \circ N^{\sigma/2}; N_{\#}^{\sigma/2} \hat{\mu}_n, \tilde{\nu}_n) + \sqrt{d} \sigma + \sqrt{d} \|N^{\sigma/2}(\mu - \hat{\mu}_n)\|_{TV} \\ & \lesssim \sqrt{d} \varepsilon + \tau + \sqrt{d} \sigma + \rho + \frac{\sqrt{d} \rho}{\sigma} + \sqrt{d} \|\beta - \beta_m\|_{TV} + \sqrt{d} \|N^{\sigma/2}(\mu - \hat{\mu}_n)\|_{TV}. \end{aligned}$$

Finally, we correct the target measure, using Lemma 2 to bound

$$\begin{aligned} & \mathcal{E}_1(\bar{\kappa} \circ \text{proj}_S \circ N^{\sigma}; \mu, \nu) \leq \mathcal{E}_1(\bar{\kappa} \circ \text{proj}_S \circ N^{\sigma}; \mu, \tilde{\nu}_n) + 2W_p(\tilde{\nu}_n, \nu) \\ & \lesssim \sqrt{d} \varepsilon + \tau + \sqrt{d} \sigma + \rho + \frac{\sqrt{d} \rho}{\sigma} + \sqrt{d} \|\beta - \beta_m\|_{TV} + \sqrt{d} \|N^{\sigma/2}(\mu - \hat{\mu}_n)\|_{TV} + W_p(\tilde{\nu}_n, \nu) \end{aligned}$$

Taking expectations, using our early bound on the first TV distance, and applying Lemma 12 for the second TV distance, and applying Lemma 11 for the Wasserstein distance, we obtain

$$\begin{aligned} & \mathbb{E}[\mathcal{E}_1(\bar{\kappa} \circ \text{proj}_S \circ N^{\sigma}; \mu, \nu)] \\ & \lesssim \sqrt{d} \varepsilon + \tau + \sqrt{d} \sigma + \rho + \frac{\sqrt{d} \rho}{\sigma} + \sqrt{\frac{dn}{m}} + \sqrt{d 3^d (1 \vee \sigma^{-d})/n} + c_{p,d} n^{-\frac{1}{p\sqrt{2}d}} \log^2 n \end{aligned}$$

Our choice of  $\sigma$ ,  $m$ , and  $\tau$  ensure that the desired risk bound holds.

Computational complexity is dominated by the OT computation at Step 3. The source and target distributions are both supported on  $n$  points, and we require accuracy  $\tau = n^{-1/(d+2)}$ . Computing the relevant cost matrix requires time  $O(n^2 d)$ . Using a state of the art OT solver based on entropic OT (e.g., Luo et al., 2023) gives a running time of  $O(C_{\infty} n^2 / \tau) = O(C_{\infty} n^{2+1/(d+2)})$ , where  $C_{\infty}$  is the largest distance between a point in  $S$  and a point in  $T$ . Combining these two gives the first bound. Evaluation complexity is dominated by the projection step, which can be computed in a brute-force manner using  $O(nd)$  time.  $\square$

## F Extended Experiment Details

We note that all code is provided in the supplement and will be made publicly available on GitHub for the final version. Experiments were completed in less than 2 hours on the specified machine.
